# Supplementary material
Source: publisher figshare collection journal article supplement (https://diabetesjournals.figshare.com/articles/dataset/_/13200527)
Supplement: Supplementary file 1 [file 1]

## Online supplemental information:

### Supplemental Materials:

#### 1. The vector map for AAV- $\beta$ -shSTRA6

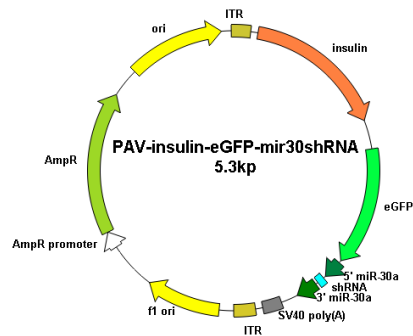

#### 2. Apo-RBP4 preparation

Apo-RBP4, retinol-free RBP4, was prepared as previously described(1, 2). Briefly, holo-RBP4 were incubated with 40% butanol-60% diisopropyl ether at 30°C overnight and centrifuged at 5000 rpm for 5min, and the bottom phase was collected. This step was repeated twice more with 1-h incubations of 40% butanol–60% diisopropyl ether. Apo- and holo-RBP4 were measured by native polyacrylamide gel electrophoresis (PAGE) and analyzed by UV spectrum from 250 to 350 nm while the 330/280 nm peak ratio near 0.9 indicated the holo-RBP4(1-4).

#### References:

1. Liu Y, Zhong Y, Chen H, Wang D, Wang M, Ou JS, Xia M. Retinol-Binding Protein-Dependent Cholesterol Uptake Regulates Macrophage Foam Cell Formation and Promotes Atherosclerosis. *Circulation* 2017;135:1339-1354
2. Norseen J, Hosooka T, Hammarstedt A, Yore MM, Kant S, Aryal P, Kiernan UA, Phillips DA, Maruyama H, Kraus BJ, Usheva A, Davis RJ, Smith U, Kahn BB. Retinol-binding protein 4 inhibits insulin signaling in adipocytes by inducing proinflammatory cytokines in macrophages through a c-Jun N-terminal kinase- and toll-like receptor 4-dependent and retinol-independent mechanism. *Mol Cell Biol* 2012;32:2010-2019
3. Frey SK, Nagl B, Henze A, Raila J, Schlosser B, Berg T, Tepel M, Zidek W, Weickert MO, Pfeiffer AF, Schweigert FJ. Isoforms of retinol binding protein 4 (RBP4) are increased in chronic diseases of the kidney but not of the liver. *Lipids Health Dis* 2008;7:29
4. Kanai M, Raz A, Goodman DS. Retinol-binding protein: the transport protein for vitamin A in human plasma. *J Clin Invest* 1968;47:2025-2044

**Supplemental Table 1. The primers used in quantitative real-time PCR**

**Supplemental Table 2. General parameters of mice injected with either AAV-β-GFP or AAV-β-shSTRA6**

**Supplemental Table 3. General parameters of mice injected with either AAV-GFP or AAV-shRBP4**

**Supplemental Figure 1.** The expression levels of RBP4 in primary islets and β cells: A. Quantitative RT-PCR analysis of RBP4 mRNA expression levels in islets isolated from C57BL/J mice and INS-1 cell line while the expression level in liver was used as positive control.

**Supplemental Figure 2.** Glucose stimulated insulin secretion levels from the primary islets after 80μg/ml apo-RBP4 treatment. A. Apo- and holo-RBP4 were measured by native polyacrylamide gel electrophoresis (PAGE). B. Apo- and holo-RBP4 were analyzed by UV spectrum from 250 to 350 nm and the 330/280 nm peak ratio near 0.9 indicated the holo-RBP4. C. 2.0mM (basal) or 16.8mM glucose induced insulin secretion levels after 80μg/ml apo-RBP4 treatment for 24h and the corresponding stimulatory index.

**Supplemental Figure 3.** The glucose homeostasis in RBP4-Tg mice. A. the mouse(left) and human(right) RBP4 mRNA expression level in the liver of WT and RBP4-Tg mice presented as  $2^{-\Delta CT}$ ; B. the mouse(left) and human(right) RBP4 levels in serum of WT and RBP4-Tg mice as measured by corresponding ELISA kits; C-D. fasting glucose levels(C) and fed glucose levels(D) in serum of WT and RBP4-Tg mice at indicated age; E-F. glucose tolerance test (E) and insulin tolerance test(F) were performed on 8-week-old(left), 12-week-old(middle) and 16-week-old (right) WT and RBP4-Tg

mice with measurement of blood glucose concentrations; G-H. fasting insulin levels(G) and fed insulin levels(H) in serum of WT and RBP4-Tg mice at indicated age.

**Supplemental Figure 4.** The glucose homeostasis and  $\beta$  cell function in the AAV-shRBP4 treated RBP4-Tg mice. A-C. Glucose tolerance test(A), GSIS level(B) and the corresponding insulinogenic index(C) in AAV-GFP or AAV-shRBP4 treated RBP4-Tg mice. D-E. GSIS level in primary islets isolated from AAV-GFP or AAV-shRBP4 treated RBP4-Tg mice (D) and the stimulatory index(E).

**Supplemental Figure 5.** A. The mRNA expression levels of pro-inflammation cytokines (*TNF $\alpha$* , *IL-1 $\beta$* , *F4/80* and *MCP-1*) and anti-inflammation cytokines (*IL-10* and *IL-4*) in islets isolated from WT and RBP4-Tg mice.

**Supplemental Figure 6.** A. STRA6 expression levels in INS-1E cells after transfected with scrambled or STRA6-targeting siRNA and then incubated with 80 $\mu$ g/ml RBP4; B. Phosphorylation levels of JAK2/STAT1 signaling cascade in INS-1E cells after transfected with scrambled or STRA6-targeting siRNA and then incubated with 80 $\mu$ g/ml RBP4 for 24h(n=3-4).

**Supplemental Figure 7.** A. Phosphorylation levels of JAK2/STAT1/ISL-1 signaling cascade in INS-1E cells after pretreated with or without 50 $\mu$ mol/L fludarabine for 12h and then incubated with 80 $\mu$ g/ml RBP4.

**Supplemental Table 1. the primers used in quantitative real-time PCR**

| <b>Gene</b>                | <b>Forwards primers</b>  | <b>Reverse primers</b>   |
|----------------------------|--------------------------|--------------------------|
| mouse- $\beta$ -actin      | AGCCATGTACGTAGCCATCC     | GTGGTGGTGAAGCTGTAGCC     |
| rat- $\beta$ -actin        | AACACCCAGCCATGTACGTAG    | GAACCGCTCATTGCCGATAGT    |
| mouse-RBP4                 | AGTCAAGGAGAACTTCGACAAGG  | CTTGGCTGTGGCGCTCATA      |
| rat-RBP4                   | ATCATCGCTGAGTTTTCTGTGG   | CTTCTGTGTCTGTGAAAGTGCC   |
| human-RBP4                 | AGGAGAACTTCGACAAGGCTC    | GAGAACTCCGCGACGATGTT     |
| mouse -STRA6               | GGCTCTGCTCTACTATCCAGC    | GGAGACTCTGCACAAGTTGTACT  |
| rat-STRA6                  | ACTGGCTGGCCTCAATCCTCA    | ATAATGGCTATTTGGCGGGTGC   |
| mouse-Glut2                | TCAGAAGACAAGATCACCGGA    | GCTGGTGTGACTGTAAGTGGG    |
| mouse-Gck                  | TGAGCCGGATGCAGAAGGA      | GCAACATCTTTACTACTGGCCT   |
| mouse-Pdh                  | GGACTTCGGGTGAGTGAATGC    | TCTGAGAAGATTGTCGGGGA     |
| mouse-kir6.2               | CCTTTTCTCCATCGAGGTCCA    | GCCCGACGATATTCTGCACA     |
| mouse-Cav1.3               | CCCAAAGAAAACGTCAGCAATAC  | GAGGGATAAACAGAAAAGGGCA   |
| mouse-Cav1.2               | TCCCAGCACATCCCTACTC      | ACTGACGGTAGAGATGGTTGC    |
| mouse-Cav2.1               | TTGAGGCTGGAATTAAGATCGTG  | CTCAGTGTCCGTAGGTCAAAC    |
| mouse-Cav3.2               | CGTGACACTGGGCATGTTC      | TCCGTCCAGAGAGTATTCCATC   |
| mouse-Snap25               | CAACTGGAACGCATTGAGGAA    | GGCCACTACTCCATCCTGATTAT  |
| mouse-Vamp2                | GCTGGATGACCGTGCAGAT      | GATGGCGCAGATCACTCCC      |
| mouse-connexin36           | CAGCAGCACTCCACTATGATTG   | CGTACACCGTCTCCCCTACAA    |
| mouse-Ins1                 | CACTTCCTACCCCTGCTGG      | ACCACAAAGATGCTGTTTGACA   |
| mouse-Ins2                 | TGGAGGCTCTTACCTGGTG      | TCTACAATGCCACGCTTCTG     |
| mouse-MafA                 | AGGAGGAGGTCATCCGACTG     | CTTCTCGTCTCCAGAATGTG     |
| mouse-Neurod1              | ATGACCAAATCATAACAGCGAGAG | TCTGCCTCGTGTTCCCTCGT     |
| mouse-Pdx1                 | CCCCAGTTTACAAGCTCGCT     | CTCGGTTCCATTCGGGAAAGG    |
| mouse-Is11                 | ATGATGGTGGTTTACAGGCTAAC  | TCGATGCTACTTCACTGCCAG    |
| mouse-Pax6                 | TACCAGTGTCTACCAGCCAAT    | TGCACGAGTATGAGGAGGTCT    |
| mouse-Lmx1 $\alpha$        | TTCAAAGTGCGATTGAGACCTC   | CAGTTTCTCGTAGTGGTACTTGC  |
| mouse -Hnf4 $\alpha$       | ATGCGACTCTCTAAAACCCTTG   | ACCTTCAGATGGGGACGTGT     |
| mouse -Nkx6.1              | CTGCACAGTATGGCCGAGATG    | CCGGGTTATGTGAGCCCAA      |
| mouse -F4/80               | CTTTGGCTATGGGCTTCCAGTC   | GCAAGGAGGACAGAGTTTATCGTG |
| mouse-MCP-1                | CCACTCACCTGCTGCTACTCA    | TGGTGATCCTCTTGTAGCTCTCC  |
| mouse-Interleukin1 $\beta$ | GAAATGCCACTTTTGACAGTG    | TGGATGCTCTCATCAGGACAG    |
| mouse-TNF $\alpha$         | ACGGCATGGATCTCAAAGAC     | AGATAGCAAATCGGCTGACG     |
| mouse-IL10                 | GCTCTTACTGACTGGCATGAG    | CGCAGCTCTAGGAGCATGTG     |
| mouse-IL4                  | GGTCTCAACCCCCAGCTAGT     | GCCGATGATCTCTCTCAAGTGAT  |
| rat-Ins1                   | GATCCACAATGCCACGCTTCT    | ACCCAAGTCCCGTCGTGAAGT    |
| rat-Ins2                   | TGTAGAAGAATCCACGCTCCC    | GGCTTTTGTCAAACAGCACCT    |

|                   |                       |                           |
|-------------------|-----------------------|---------------------------|
| rat-Glut2         | GGGACAAACTCGGAAGGATCA | CCTGAGTGTGGTTGGAGCAA      |
| rat-Gck           | GTGGAGCCCAGTTGTTGACT  | GCTCGACCCTCCACATGATA      |
| rat-Pdh           | CTGCGCTCCATGAGGAAGAT  | TAGACGATGAAGGTCACATTTCTTA |
| rat-kir6.2        | GTCAGGGGCTCAGTAAGCAA  | CTTGCACCAACCTCTGGACT      |
| rat-Cav1.3        | ATCCAAGCTCAGATCGCACG  | ACGGCTGTAGGGTCTGACAT      |
| rat-Cav1.2        | GAAACATGAGCATGCCACAA  | CAGTAGCGGCTGAACTTGA       |
| rat-Cav2.1        | TTGCGAGTAATATCGCCCC   | AGCTCCACCCTTTGCGATTT      |
| rat-Cav3.2        | CGGCGCCTGGAGAGGA      | CATCCAGGGACTTGGGCTG       |
| rat-Snap25        | TGGATGAGCAAGGCGAACAA  | TCCTGATTATTGCCCCAGGC      |
| rat-Vamp2         | GCCATATCTTTCAGCCCCCT  | GGGTGTTAAGGACAACCGGA      |
| rat-connexin36    | CTGGGATGGCGGAAGATCAA  | GAGTCCTGCCGAAATTGGGA      |
| rat-MafA          | ATTCTGGAGAGCGAGAAGTGC | ATTTCTCCTTGTACAGGTCCCCG   |
| rat-Neurod1       | AGCCCCCTAACTGATTGCAC  | TCGGTGGATGGTTTCGTGTTT     |
| rat-Pdx1          | CCTTTCCCGAATGGAACCGA  | TTTTCCACGCGTGAGCTTTG      |
| rat-Is11          | TGAAACCAGACCCGGATGACT | CACAAACAGCCCGAGAAGACC     |
| rat-Lmx1 $\alpha$ | TGCCAGCATTGCCACTACCAT | CCAGCGAGCCAAGATGAAGAA     |
| rat-Hnf4 $\alpha$ | GTCATGGTCAGTGTGAACGC  | TGTGGTTCTTCCTCACGCTC      |
| rat-Nkx6.1        | CTGCTCTGCCGACCAAGTAA  | CGAAAGAGGAGTGAGTCGGG      |
| rat-Pax6          | CAATCTGCTCCTGGGTAAAAG | AACTAAGGATGCTGAACGGAC     |

The primer sequences for indicated gene/protein were shown. Abbreviations: RBP4, retinol binding protein 4; STRA6, stimulated by retinoic acid 6; Glut2, glucose transport protein 2; Gck, glucokinase; Pdh, pyruvate dehydrogenase; Neurod1, neuronal differentiation 1; Pdx1, pancreatic duodenal homeobox 1; Is11, LIM-homeodomain transcriptional factor Islet-1, Hnf4 $\alpha$ , hepatocyte nuclear factor 4 $\alpha$ ; Nkx6.1, NK homeobox factor 6.1; Pax6, paired box 6.

**Supplemental Table 2. General parameters of mice injected with either AAV- $\beta$ -GFP or AAV- $\beta$ -shSTRA6**

|                                    | <b>WT+AAV-<math>\beta</math>-GFP</b> | <b>RBP4-Tg+AAV-<math>\beta</math>-GFP</b> | <b>RBP4-Tg+AAV-<math>\beta</math>-shSTRA6</b> | <b><i>p</i> value</b> | <b><i>p</i> value (WT+AAV-<math>\beta</math>-GFP vs RBP4-Tg+AAV-<math>\beta</math>-GFP)</b> | <b><i>p</i> value (RBP4-Tg+AAV-<math>\beta</math>-shSTRA6 vs RBP4-Tg+AAV-<math>\beta</math>-GFP)</b> |
|------------------------------------|--------------------------------------|-------------------------------------------|-----------------------------------------------|-----------------------|---------------------------------------------------------------------------------------------|------------------------------------------------------------------------------------------------------|
| <b>Initial body weight</b>         | 25.23 $\pm$ 1.43                     | 25.77 $\pm$ 1.23                          | 25.39 $\pm$ 1.92                              | 0.83                  | 0.49                                                                                        | 0.69                                                                                                 |
| <b>Final Body weight(g)</b>        | 26.93 $\pm$ 1.02                     | 27.27 $\pm$ 1.5                           | 27.33 $\pm$ 1.4                               | 0.85                  | 0.65                                                                                        | 0.95                                                                                                 |
| <b>Liver weight(g)</b>             | 1.11 $\pm$ 0.15                      | 1.19 $\pm$ 0.08                           | 1.15 $\pm$ 0.09                               | 0.46                  | 0.26                                                                                        | 0.42                                                                                                 |
| <b>Subcutaneous fat weight (g)</b> | 0.6 $\pm$ 0.15                       | 0.63 $\pm$ 0.22                           | 0.59 $\pm$ 0.13                               | 0.94                  | 0.84                                                                                        | 0.75                                                                                                 |
| <b>Epididymal fat weight(g)</b>    | 0.59 $\pm$ 0.23                      | 0.8 $\pm$ 0.25                            | 0.76 $\pm$ 0.21                               | 0.27                  | 0.16                                                                                        | 0.78                                                                                                 |

All values are mean  $\pm$  SD, n = 7-10. Significant *p* values are indicated in bold.

**Supplemental Table 3. General parameters of mice injected with either AAV-GFP or AAV-shRBP4**

|                                    | <b>Control+AAV-GFP</b> | <b>db/db+AAV-GFP</b> | <b>db/db+AAV-shRBP4</b> | <b><i>p</i> value</b><br>(db/db+AAV-shRBP4 vs db/db+AAV-GFP) |
|------------------------------------|------------------------|----------------------|-------------------------|--------------------------------------------------------------|
| <b>Initial body weight</b>         | 18.82±1.22             | 30.76±3.72           | 30.31±3.36              | 0.79                                                         |
| <b>Final Body weight(g)</b>        | 21.83±1.32             | 40.31±1.88           | 36.96±2.75              | <b>0.01</b>                                                  |
| <b>Liver weight(g)</b>             | 0.97±0.09              | 2.38±0.49            | 2.13±0.34               | 0.14                                                         |
| <b>Subcutaneous fat weight (g)</b> | 0.16±0.06              | 2.41±0.3             | 2.27±0.48               | 0.19                                                         |
| <b>Epididymal fat weight(g)</b>    | 0.19±0.06              | 1.98±0.25            | 1.97±0.2                | 0.83                                                         |

All values are mean ± SD, n = 7-10. Significant *p* values are indicated in bold.
