# Supplementary material
Source: publisher figshare collection journal article supplement (https://diabetesjournals.figshare.com/articles/dataset/_/13200527)

Supplemental Figure 1

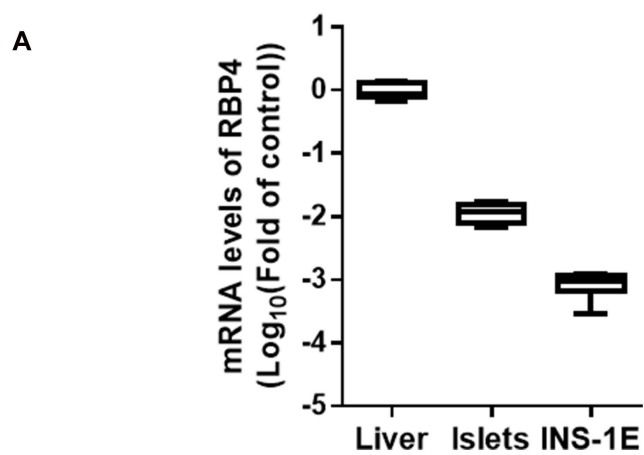

Supplemental Figure 2

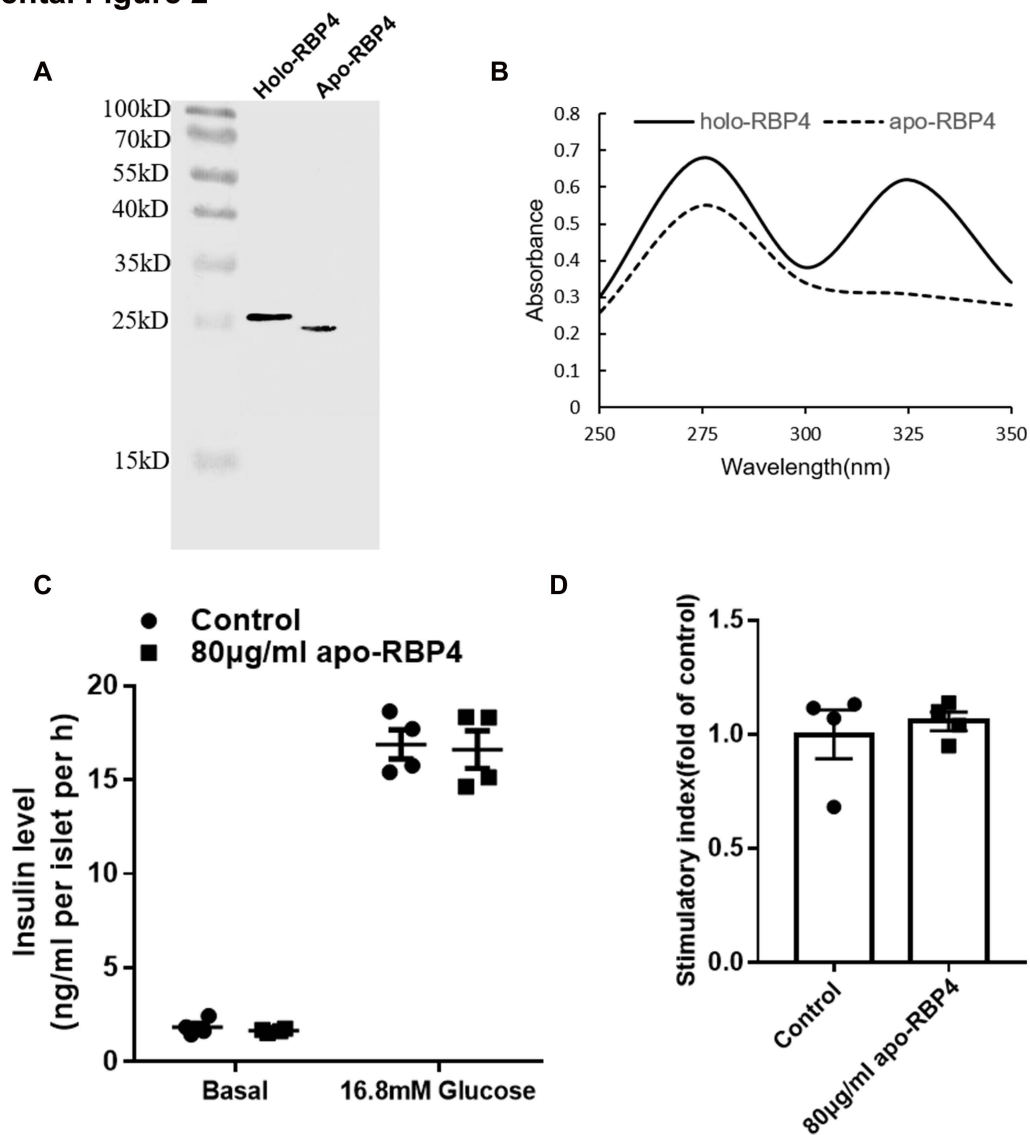

# Supplemental Figure 3

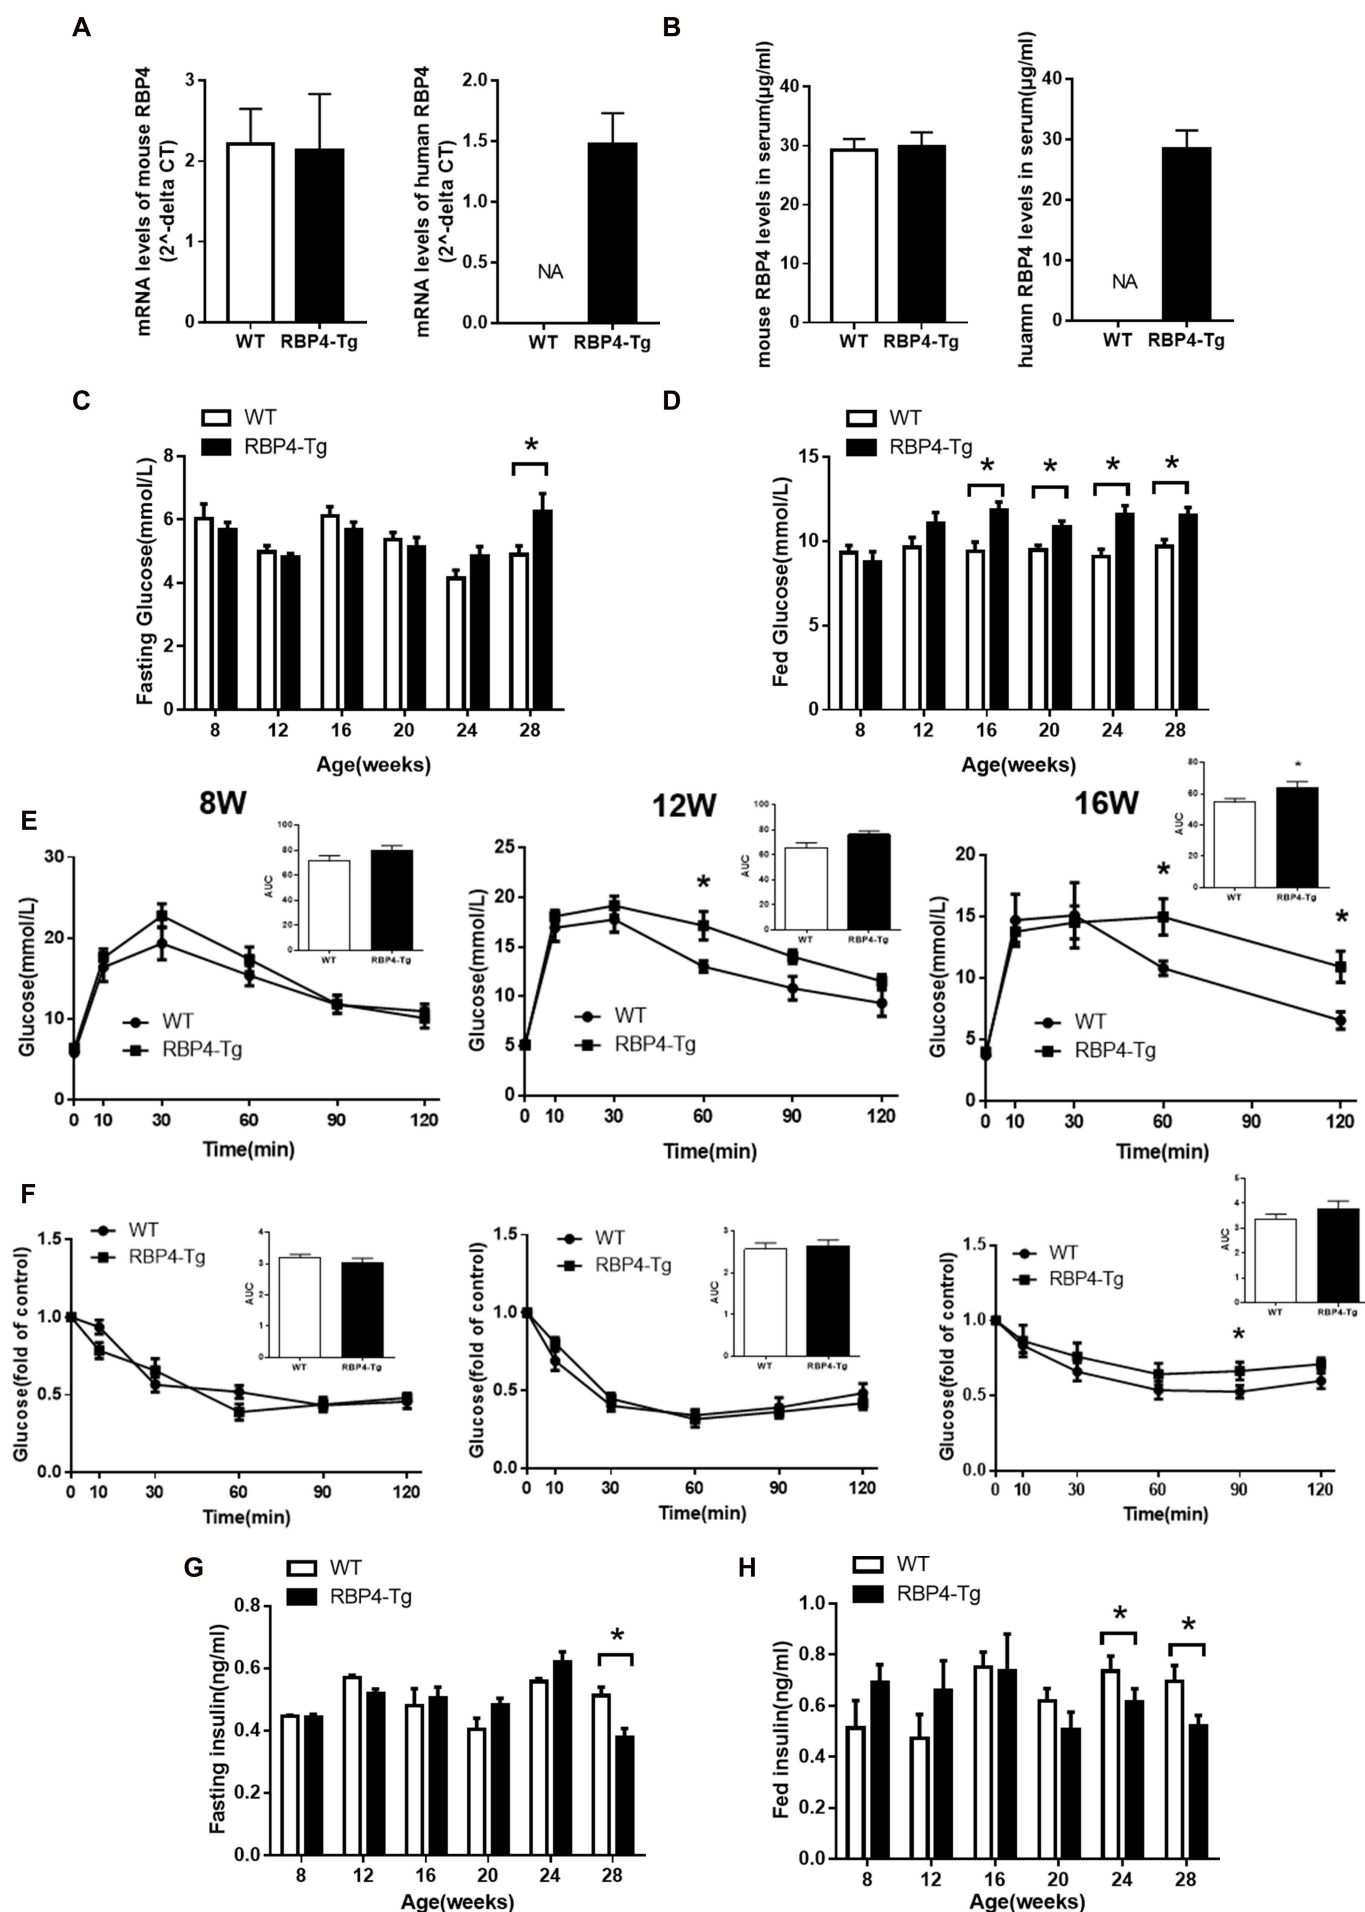

**Supplemental Figure 4**

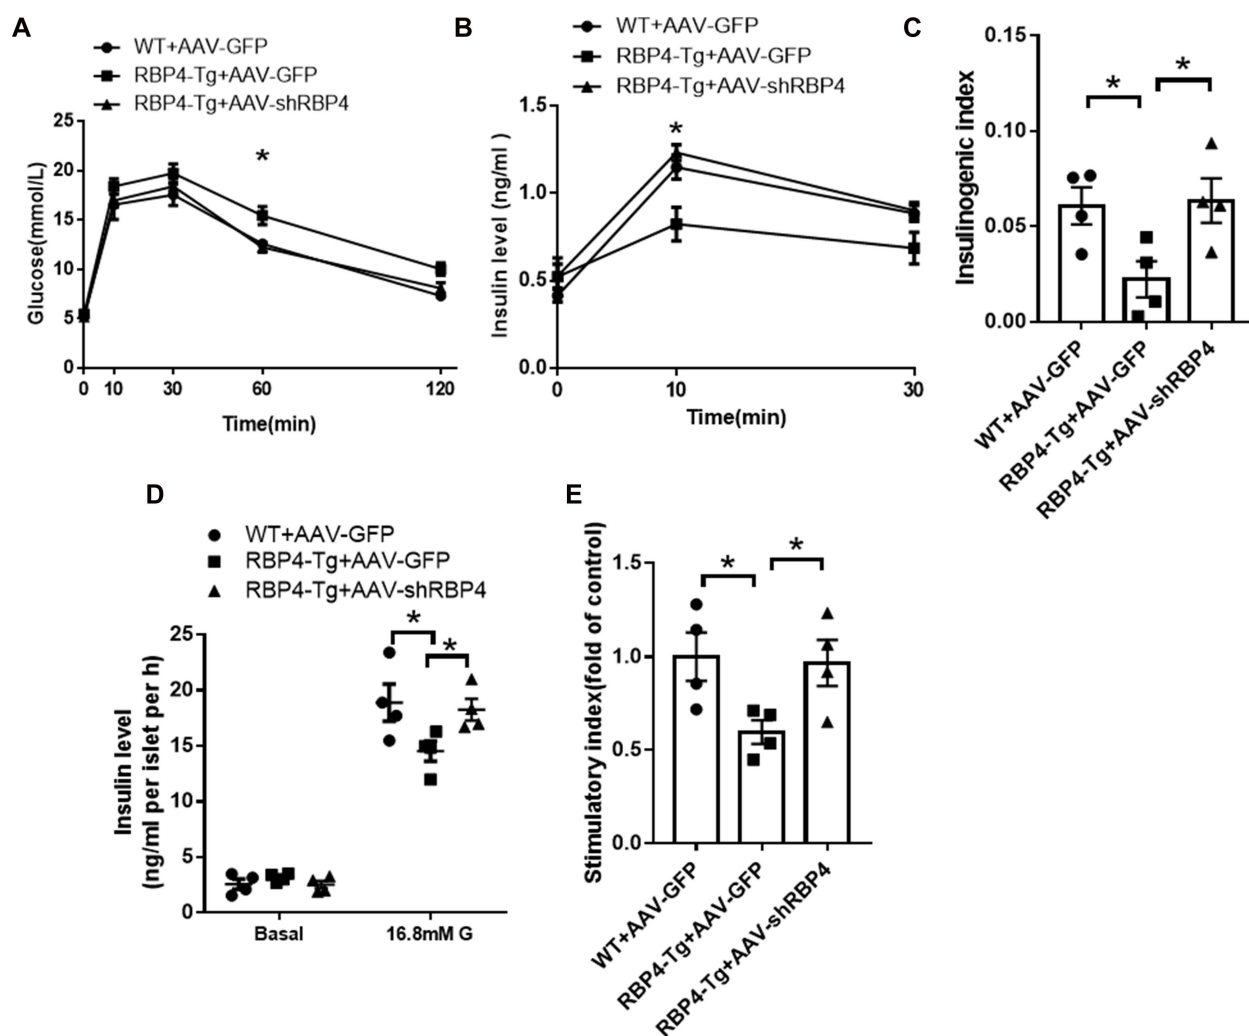

**Supplemental Figure 5**

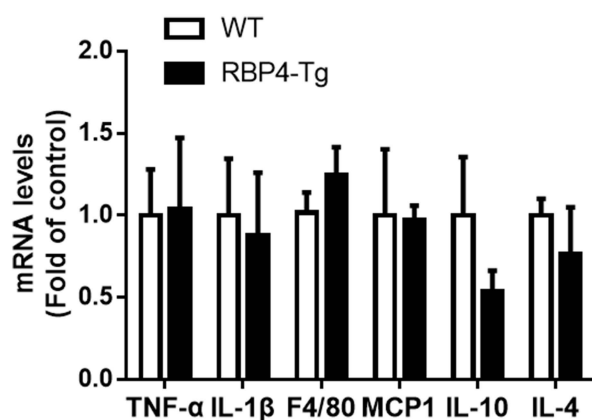

Supplemental Figure 6

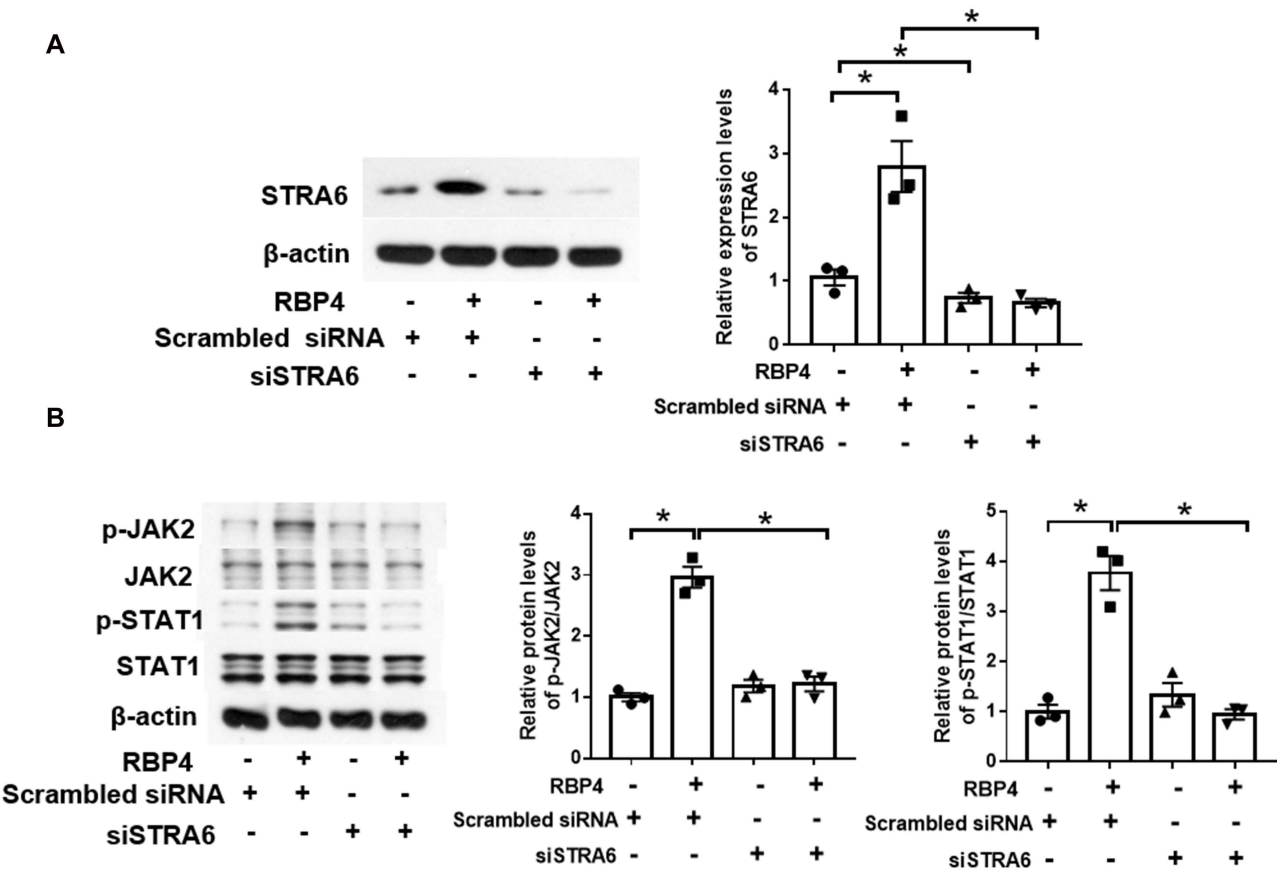

Supplemental Figure 7

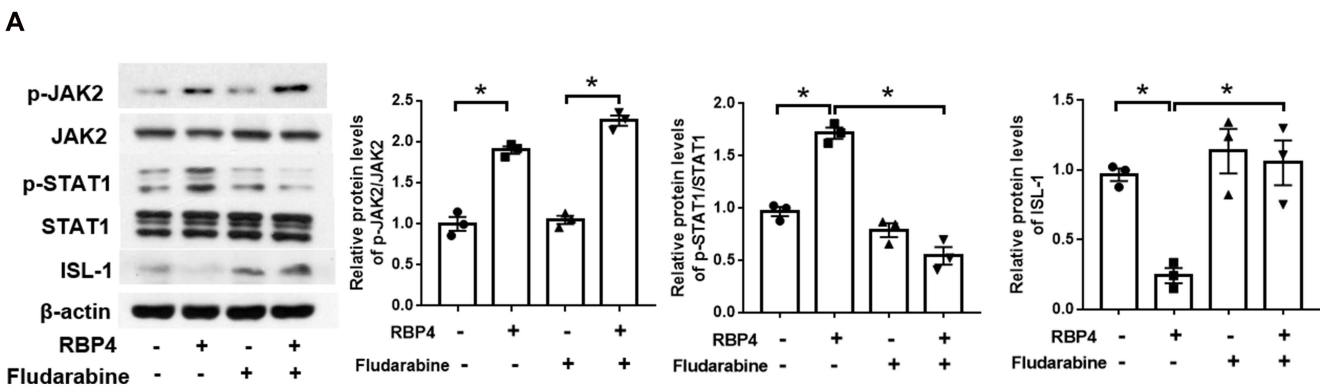

Supplement: Supplementary file 2 [file 1]
